# Supplementary material for: Synthesis and characterization of azaborepin radicals in solid neon through boron-mediated C–N bond cleavage of pyridine
Source: Royal Society of Chemistry journal article supplement (doi:10.1039/d4cp00228h), 2024-01-01
Supplement: d4cp00228h1.pdf [file d4cp00228h1.pdf]

## Supporting Information

### Synthesis and Characterization of Azaborepin Radical in Solid Neon through Boron-Mediated C–N Bond Cleavage of Pyridine

Xin Xu,<sup>a</sup> Yi-Kang Zhu,<sup>b</sup> Chuan-Ming Dai,<sup>a</sup> Jiaping Xu,<sup>a</sup> Jiwen Jian<sup>ab \*</sup>

<sup>a</sup> *Hangzhou Institute of Advanced Studies, Zhejiang Normal University, 1108 Gengwen Road,*

*Hangzhou, Zhejiang, 311231, China.*

<sup>b</sup> *Xiaoshan Campus, Zhejiang Normal University, 1108 Gengwen Road, Hangzhou, Zhejiang, 311231,*

*China.*

*\*Author to whom Correspondence should be addressed. Email: [jiwenjian@zjnu.edu.cn](mailto:jiwenjian@zjnu.edu.cn)*

**Table S1.** Observed and calculated products infrared absorptions ( $\text{cm}^{-1}$ ) in the reaction of boron atoms ( $^{10}\text{B}$  and  $^{11}\text{B}$ ) with pyridine molecules in solid neon. The calculated IR intensities are listed in parentheses in  $\text{km/mol}$ . The structural optimization and vibrational frequency computation were conducted at the B3LYP/aug-ccpVTZ level.

|          | Experimental    |                 |                 |            | Calculated      |                 |                 |             |
|----------|-----------------|-----------------|-----------------|------------|-----------------|-----------------|-----------------|-------------|
|          | $^{10}\text{B}$ | $^{11}\text{B}$ | $^{15}\text{N}$ | D          | $^{10}\text{B}$ | $^{11}\text{B}$ | $^{15}\text{N}$ | D           |
| <b>A</b> | 1311.3          | 1311.3          | 1311.1          | 1283.0     | 1345.0 (10)     | 1345.0 (10)     | 1344.8 (11)     | 1312.9 (16) |
|          | 1293.9          | 1277.5          | 1274.1          | 1215.6     | 1308.0 (142)    | 1290.0 (134)    | 1288.1 (135)    | 1239.5 (23) |
|          | 1247.8          | 1244.8          | 1235.2          | 1172.2     | 1261.9 (12)     | 1261.9 (12)     | 1249.3 (13)     | 1177.1 (3)  |
|          | 973.7           | 973.7           | --              | 850.5      | 1011.1 (23)     | 1011.1 (23)     | 1011.0 (23)     | 864.5 (11)  |
|          | 664.1           | 663.7           | 661.3           | 569.4      | 691.5 (60)      | 691.4 (60)      | 688.2 (64)      | 650.0 (9)   |
|          | 609.8           | 609.8           | 609.8           | 468.7      | 637.9 (29)      | 637.9 (29)      | 636.7 (26)      | 486.9 (35)  |
| <b>B</b> | 1131.1          | 1125.2          | 1114.2/1111.9   | 967.4      | 1160.0 (29)     | 1157.4 (26)     | 1151.6 (21)     | 988.3 (6)   |
|          | 1010.4          | 1010.2          | --              | 850.6      | 1046.5 (11)     | 1044.9 (10)     | 1043.5 (9)      | 874.1 (20)  |
|          | 891.2           | 890.8           | 891.2           | 798.5      | 922.5 (18)      | 918.3 (25)      | 920.1 (24)      | 790.9 (1)   |
|          | 858.2           | 857.3           | 858.1           | 772.3      | 890.3 (30)      | 887.7 (23)      | 889.5 (23)      | 762.2 (18)  |
|          | 796.4/789.6     | 795.5/789.6     | 788.8/787.4     | 621.4      | 828.7 (10)      | 820.8 (10)      | 821.8 (11)      | 626.2 (10)  |
| <b>C</b> | 1745.3          | 1703.3          | 1736.3          | -          | 1770.8 (48)     | 1722.8 (51)     | 1756.1 (46)     | 1759.5 (47) |
|          | 1533.5          | 1530.8          | 1529.9          | 1473.0     | 1553.5 (40)     | 1552.7 (40)     | 1553.0 (38)     | 1508.1 (48) |
|          | 1374.1          | 1373.2          | 1371.0          | 1171.5     | 1411.2 (12)     | 1410.1 (13)     | 1409.2 (10)     | 1198.3 (13) |
|          | 1278.5          | 1271.9          | 1278.4          | -          | 1321.8 (78)     | 1316.3 (70)     | 1317.2 (76)     | 1011.4 (7)  |
|          | 1239.0          | 1238.2          | 1238.6          | 1132.1     | 1262.1 (18)     | 1261.5 (19)     | 1261.7 (20)     | 1146.5 (23) |
|          | 1168.7          | 1168.2          | 1169.1          | 807.2      | 1191.8 (39)     | 1191.5 (38)     | 1190.7 (40)     | 868.8 (0)   |
|          | 1137.5          | 1134.8          | 1137.2          | -          | 1163.6 (19)     | 1161.6 (21)     | 1158.1 (19)     | 913.0 (5)   |
|          | 719.5           | 719.2           | 719.2           | -          | 738.1 (22)      | 738.0 (22)      | 737.9 (22)      | 573.3 (3)   |
|          | 638.5           | 630.7           | 637.5           | 606.3      | 670.3 (30)      | 660.5 (27)      | 668.0 (30)      | 653.2 (28)  |
| 609.2    | 608.9           | -               | -               | 616.0 (71) | 615.8 (70)      | 615.8 (72)      | 457.9 (2)       |             |

**Table S2.** Product infrared absorptions ( $\text{cm}^{-1}$ ) observed in the reaction of boron atoms ( $^{10}\text{B}$  and  $^{11}\text{B}$ ) with isotopic pyridine molecules in solid neon. The boron-11, nitrogen-15, and deuterium isotopic shifts ratio are labeled as  $R_{10/11}$ ,  $R_{14/15}$ , and  $R_{1/2}$ . The structural optimization and vibrational frequency computation were conducted at the B3LYP/aug-ccpVTZ level.

|          | Experimental    |             |             |           | Calculated      |             |             |           |
|----------|-----------------|-------------|-------------|-----------|-----------------|-------------|-------------|-----------|
|          | $^{10}\text{B}$ | $R_{10/11}$ | $R_{14/15}$ | $R_{1/2}$ | $^{10}\text{B}$ | $R_{10/11}$ | $R_{14/15}$ | $R_{1/2}$ |
| <b>A</b> | 1311.3          | 1.0000      | 1.0002      | 1.0221    | 1345.0 (10)     | 1.0000      | 1.0001      | 1.0244    |
|          | 1293.9          | 1.0128      | 1.0155      | 1.0644    | 1308.0 (142)    | 1.0139      | 1.0154      | 1.0553    |
|          | 1247.8          | 1.0000      | 1.0142      | 1.0688    | 1261.9 (12)     | 1.0000      | 1.0101      | 1.0720    |
|          | 973.7           | 1.0000      | 1.0001      | 1.1453    | 1011.1 (23)     | 1.0000      | 1.0001      | 1.1696    |
|          | 664.1           | 1.0006      | 1.0042      | 1.1663    | 691.5 (60)      | 1.0001      | 1.0048      | 1.0638    |
|          | 609.8           | 1.0000      | 1.0000      | 1.3010    | 637.9 (29)      | 1.0000      | 1.0019      | 1.3101    |
|          |                 |             |             |           |                 |             |             |           |
| <b>B</b> | 1131.1          | 1.0052      | 1.0003      | 1.1692    | 1160.0 (29)     | 1.0022      | 1.0073      | 1.1737    |
|          | 1010.4          | 1.0002      | 1.0098      | 1.1879    | 1046.5 (11)     | 1.0015      | 1.0029      | 1.1972    |
|          | 891.2           | 1.0004      | 1.0066      | 1.1161    | 922.5 (18)      | 1.0046      | 1.0026      | 1.1664    |
|          | 858.2           | 1.0010      | 1.0001      | 1.1112    | 890.3 (30)      | 1.0029      | 1.0009      | 1.1681    |
|          | 796.4/789.6     | 1.0011      | 1.0091      | 1.2816    | 828.7 (10)      | 1.0096      | 1.0084      | 1.3234    |
|          |                 |             |             |           |                 |             |             |           |
| <b>C</b> | 1745.3          | 1.0247      | 1.0103      | -         | 1770.8 (48)     | 1.0278      | 1.0084      | 1.0064    |
|          | 1533.5          | 1.0011      | 1.0002      | 1.0291    | 1553.5 (40)     | 1.0005      | 1.0003      | 1.0301    |
|          | 1374.1          | 1.0007      | 1.0023      | 1.1729    | 1411.2 (12)     | 1.0008      | 1.0014      | 1.1777    |
|          | 1278.5          | 1.0057      | 1.0008      | -         | 1321.8 (78)     | 1.0042      | 1.0035      | 1.3069    |
|          | 1239.0          | 1.0008      | 1.0003      | 1.0944    | 1262.1 (18)     | 1.0005      | 1.0003      | 1.1008    |
|          | 1168.7          | 1.0013      | 1.0003      | 1.4487    | 1191.8 (39)     | 1.0003      | 1.0009      | 1.3718    |
|          | 1137.5          | 1.0024      | 1.0003      | -         | 1163.6 (19)     | 1.0018      | 1.0047      | 1.2745    |
|          | 719.5           | 1.0004      | 1.0004      | -         | 738.1 (22)      | 1.0000      | 1.0003      | 1.2875    |
|          | 638.5           | 1.0124      | 1.0016      | 1.0531    | 670.3 (30)      | 1.0148      | 1.0034      | 1.0262    |
|          | 609.2           | 1.0007      | -           | -         | 616.0 (71)      | 1.0002      | 1.0003      | 1.3453    |

**Table S3.** Calculated vibrational frequencies (unscaled,  $\text{cm}^{-1}$ ) and intensities (in parentheses in  $\text{km/mol}$ ) of the species A. The experimentally observed values for  $^{10}\text{B}(\text{C}_5\text{H}_5\text{N})$  are also listed for comparison. The structural optimization and vibrational frequency computation were conducted at the B3LYP/aug-ccpVTZ level.

| $^{10}\text{B}$                   |                                   |                                                 | $^{11}\text{B}$                   |                               |               |
|-----------------------------------|-----------------------------------|-------------------------------------------------|-----------------------------------|-------------------------------|---------------|
| B+C <sub>5</sub> H <sub>5</sub> N | B+C <sub>5</sub> D <sub>5</sub> N | B+C <sub>5</sub> H <sub>5</sub> <sup>15</sup> N | B+C <sub>5</sub> H <sub>5</sub> N | $^{10}\text{B}/^{11}\text{B}$ | Experimental  |
| 3223.0(2)                         | 2391.0(0)                         | 3223.0(2)                                       | 3223.0(2)                         | 1.0000                        |               |
| 3220.3(0)                         | 2382.2(1)                         | 3220.3(0)                                       | 3220.3(0)                         | 1.0000                        |               |
| 3215.8(1)                         | 2375.1(0)                         | 3215.8(1)                                       | 3215.8(1)                         | 1.0000                        |               |
| 3189.5(9)                         | 2351.4(6)                         | 3189.5(9)                                       | 3189.5(9)                         | 1.0000                        |               |
| 3186.7(0)                         | 2351.4(0)                         | 3186.7(0)                                       | 3186.7(0)                         | 1.0000                        |               |
| 1630.9(0)                         | 1578.1(2)                         | 1628.9(1)                                       | 1630.8(0)                         | 1.0000                        |               |
| 1538.0(1)                         | 1447.6(1)                         | 1538.0(1)                                       | 1538.0(1)                         | 1.0000                        |               |
| 1475.7(6)                         | 1332.8(124)                       | 1473.2(3)                                       | 1475.3(5)                         | 1.0003                        |               |
| 1394.1(3)                         | 1043.1(0)                         | 1394.1(3)                                       | 1394.1(3)                         | 1.0000                        |               |
| <b>1345.0(10)</b>                 | <b>1312.9(16)</b>                 | <b>1344.8(11)</b>                               | <b>1345.0(10)</b>                 | 1.0000                        | <b>1311.3</b> |
| <b>1308.0(142)</b>                | <b>1239.5(23)</b>                 | <b>1288.1(135)</b>                              | <b>1290.0(134)</b>                | 1.0139                        | <b>1293.9</b> |
| <b>1261.9(12)</b>                 | <b>1177.1(3)</b>                  | <b>1249.3(13)</b>                               | <b>1261.9(12)</b>                 | 1.0000                        | <b>1247.8</b> |
| 1201.7(2)                         | 882.8(7)                          | 1199.5(5)                                       | 1200.0(2)                         | 1.0014                        |               |
| 1121.6(1)                         | 832.3(1)                          | 1120.0(1)                                       | 1121.6(1)                         | 1.0000                        |               |
| 1060.9(1)                         | 846.6(2)                          | 1051.2(1)                                       | 1060.9(1)                         | 1.0000                        |               |
| <b>1011.1(23)</b>                 | <b>864.5(11)</b>                  | <b>1011.0(23)</b>                               | <b>1011.0(23)</b>                 | 1.0000                        | <b>973.7</b>  |
| 987.9(3)                          | 956.2(0)                          | 987.3(3)                                        | 985.9(3)                          | 1.0020                        |               |
| 965.1(0)                          | 774.4(0)                          | 965.1(0)                                        | 965.1(0)                          | 1.0000                        |               |
| 963.4(1)                          | 786.2(0)                          | 963.3(1)                                        | 963.4(1)                          | 1.0000                        |               |
| 817.2(1)                          | 749.2(2)                          | 815.6(0)                                        | 808.0(1)                          | 1.0114                        |               |
| 789.8(6)                          | 602.1(6)                          | 789.4(6)                                        | 789.8(6)                          | 1.0000                        |               |
| 767.9(0)                          | 603.6(0)                          | 767.9(0)                                        | 767.9(0)                          | 1.0000                        |               |
| <b>691.5(60)</b>                  | <b>650.0(9)</b>                   | <b>688.2(64)</b>                                | <b>691.4(60)</b>                  | 1.0001                        | <b>664.1</b>  |
| 645.2(0)                          | 618.5(0)                          | 644.1(0)                                        | 645.2(0)                          | 1.0000                        |               |
| <b>637.9(29)</b>                  | <b>486.9(35)</b>                  | <b>636.7(26)</b>                                | <b>637.9(29)</b>                  | 1.0000                        | <b>609.8</b>  |
| 518.5(0)                          | 505.8(0)                          | 515.4(0)                                        | 511.8(0)                          | 1.0132                        |               |
| 410.9(0)                          | 358.4(0)                          | 410.9(0)                                        | 410.9(0)                          | 1.0000                        |               |
| 381.2(1)                          | 344.2(2)                          | 375.0(1)                                        | 379.9(1)                          | 1.0036                        |               |
| 287.7(22)                         | 280.8(22)                         | 286.6(22)                                       | 279.3(21)                         | 1.0298                        |               |
| 155.0(9)                          | 146.2(9)                          | 154.8(9)                                        | 152.1(9)                          | 1.0190                        |               |

**Table S4.** Calculated vibrational frequencies (unscaled,  $\text{cm}^{-1}$ ) and intensities (in parentheses in  $\text{km/mol}$ ) of the species **B**. The experimentally observed values for  $^{10}\text{B}(\text{C}_5\text{H}_5\text{N})$  are also listed for comparison. The structural optimization and vibrational frequency computation were conducted at the B3LYP/aug-ccpVTZ level.

| $^{10}\text{B}$                   |                                   |                                                 | $^{11}\text{B}$                   |                               |                    |
|-----------------------------------|-----------------------------------|-------------------------------------------------|-----------------------------------|-------------------------------|--------------------|
| B+C <sub>5</sub> H <sub>5</sub> N | B+C <sub>5</sub> D <sub>5</sub> N | B+C <sub>5</sub> H <sub>5</sub> <sup>15</sup> N | B+C <sub>5</sub> H <sub>5</sub> N | $^{10}\text{B}/^{11}\text{B}$ | Experimental       |
| 3222.8(13)                        | 2406.7(6)                         | 3222.8(13)                                      | 3222.8(13)                        | 1.0000                        |                    |
| 3203.4(9)                         | 2381.8(5)                         | 3203.4(9)                                       | 3203.4(9)                         | 1.0000                        |                    |
| 3198.4(5)                         | 2357.8(5)                         | 3198.4(5)                                       | 3198.4(5)                         | 1.0000                        |                    |
| 3189.4(3)                         | 2351.4(1)                         | 3189.4(3)                                       | 3189.4(3)                         | 1.0000                        |                    |
| 3182.5(1)                         | 2348.9(0)                         | 3182.5(1)                                       | 3182.5(1)                         | 1.0000                        |                    |
| 1631.6(10)                        | 1576.8(12)                        | 1631.4(10)                                      | 1631.6(10)                        | 1.0000                        |                    |
| 1481.4(4)                         | 1418.0(7)                         | 1481.3(4)                                       | 1481.1(4)                         | 1.0002                        |                    |
| 1345.5(10)                        | 1159.0(2)                         | 1345.0(10)                                      | 1345.0(10)                        | 1.0004                        |                    |
| 1307.7(0)                         | 1200.6(4)                         | 1307.7(0)                                       | 1307.3(0)                         | 1.0003                        |                    |
| 1277.6(6)                         | 1106.0(42)                        | 1277.6(6)                                       | 1277.3(6)                         | 1.0003                        |                    |
| <b>1160.0(29)</b>                 | <b>988.3(6)</b>                   | <b>1151.6(21)</b>                               | <b>1157.4(26)</b>                 | <b>1.0022</b>                 | <b>1131.1</b>      |
| 1132.0(6)                         | 971.8(8)                          | 1129.6(7)                                       | 1131.7(6)                         | 1.0003                        |                    |
| 1081.2(22)                        | 830.7(0)                          | 1078.3(25)                                      | 1074.1(23)                        | 1.0066                        |                    |
| <b>1046.5(10)</b>                 | <b>874.1(20)</b>                  | <b>1043.5(9)</b>                                | <b>1044.9(10)</b>                 | <b>1.0015</b>                 | <b>1010.4</b>      |
| 1003.3(11)                        | 814.4(2)                          | 998.4(12)                                       | 1003.0(11)                        | 1.0003                        |                    |
| 975.1(2)                          | 910.3(60)                         | 974.1(2)                                        | 973.4(1)                          | 1.0017                        |                    |
| 953.3(8)                          | 736.9(11)                         | 952.6(9)                                        | 952.2(7)                          | 1.0012                        |                    |
| 940.2(8)                          | 751.6(0)                          | 937.4(5)                                        | 938.7(7)                          | 1.0016                        |                    |
| <b>922.5(18)</b>                  | <b>790.9(1)</b>                   | <b>920.1(24)</b>                                | <b>918.3(25)</b>                  | <b>1.0045</b>                 | <b>891.2</b>       |
| <b>890.3(31)</b>                  | <b>762.2(18)</b>                  | <b>889.5(23)</b>                                | <b>887.7(23)</b>                  | <b>1.0029</b>                 | <b>858.2</b>       |
| 883.4(15)                         | 822.7(2)                          | 876.2(19)                                       | 882.2(22)                         | 1.0014                        |                    |
| <b>828.7(10)</b>                  | <b>626.2(10)</b>                  | <b>821.8(11)</b>                                | <b>820.8(10)</b>                  | <b>1.0096</b>                 | <b>795.5/789.6</b> |
| 765.8(11)                         | 682.8(2)                          | 764.2(11)                                       | 763.4(11)                         | 1.0032                        |                    |
| <b>744.4(22)</b>                  | <b>723.3(4)</b>                   | <b>742.9(20)</b>                                | <b>736.8(21)</b>                  | <b>1.0104</b>                 | -                  |
| 705.4(3)                          | 619.2(9)                          | 698.5(2)                                        | 693.8(4)                          | 1.0168                        |                    |
| 665.2(8)                          | 653.9(11)                         | 660.0(9)                                        | 662.3(7)                          | 1.0044                        |                    |
| 524.3(6)                          | 464.5(5)                          | 523.5(6)                                        | 520.1(6)                          | 1.0080                        |                    |
| 465.8(12)                         | 426.1(14)                         | 464.2(12)                                       | 459.8(11)                         | 1.0130                        |                    |
| 438.3(0)                          | 384.3(2)                          | 438.2(0)                                        | 437.6(0)                          | 1.0016                        |                    |
| 405.5(5)                          | 360.4(4)                          | 404.7(5)                                        | 397.6(5)                          | 1.0197                        |                    |

**Table S5.** Calculated vibrational frequencies (unscaled,  $\text{cm}^{-1}$ ) and intensities (in parentheses in  $\text{km/mol}$ ) of the species **C**. The experimentally observed values for  $^{10}\text{B}(\text{C}_5\text{H}_5\text{N})$  are also listed for comparison. The structural optimization and vibrational frequency computation were conducted at the B3LYP/aug-ccpVTZ level.

| $^{10}\text{B}$                   |                                   |                                                 | $^{11}\text{B}$                   |                               |               |
|-----------------------------------|-----------------------------------|-------------------------------------------------|-----------------------------------|-------------------------------|---------------|
| B+C <sub>5</sub> H <sub>5</sub> N | B+C <sub>5</sub> D <sub>5</sub> N | B+C <sub>5</sub> H <sub>5</sub> <sup>15</sup> N | B+C <sub>5</sub> H <sub>5</sub> N | $^{10}\text{B}/^{11}\text{B}$ | Experimental  |
| 3238.1(0)                         | 2393.8(1)                         | 3238.1(0)                                       | 3238.1(0)                         | 1.0000                        |               |
| 3173.7(20)                        | 2343.7(14)                        | 3173.7(20)                                      | 3173.7(20)                        | 1.0000                        |               |
| 3158.6(24)                        | 2331.4(18)                        | 3158.6(24)                                      | 3158.6(24)                        | 1.0000                        |               |
| 3139.8(5)                         | 2311.5(3)                         | 3139.8(5)                                       | 3139.8(5)                         | 1.0000                        |               |
| 3120.6(7)                         | 2299.0(3)                         | 3120.6(7)                                       | 3120.6(7)                         | 1.0000                        |               |
| <b>1770.8(48)</b>                 | <b>1759.5(47)</b>                 | <b>1756.1(46)</b>                               | <b>1722.8(51)</b>                 | <b>1.0278</b>                 | <b>1745.3</b> |
| <b>1553.5(40)</b>                 | <b>1508.1(48)</b>                 | <b>1553.0(38)</b>                               | <b>1552.7(40)</b>                 | <b>1.0005</b>                 | <b>1533.5</b> |
| 1497.0(5)                         | 1388.3(37)                        | 1496.7(5)                                       | 1497.0(5)                         | 1.0000                        |               |
| 1454.6(7)                         | 1309.7(74)                        | 1453.9(7)                                       | 1453.7(6)                         | 1.0006                        |               |
| <b>1411.2(12)</b>                 | <b>1198.3(13)</b>                 | <b>1409.2(10)</b>                               | <b>1410.1(13)</b>                 | <b>1.0008</b>                 | <b>1374.1</b> |
| <b>1321.8(78)</b>                 | <b>1011.4(7)</b>                  | <b>1317.2(76)</b>                               | <b>1316.3(70)</b>                 | <b>1.0042</b>                 | <b>1278.5</b> |
| <b>1262.1(18)</b>                 | <b>1146.5(23)</b>                 | <b>1261.7(20)</b>                               | <b>1261.5(19)</b>                 | <b>1.0005</b>                 | <b>1239.0</b> |
| <b>1191.8(39)</b>                 | <b>868.8(0)</b>                   | <b>1190.7(40)</b>                               | <b>1191.5(38)</b>                 | <b>1.0003</b>                 | <b>1168.7</b> |
| <b>1163.6(19)</b>                 | <b>913.0(5)</b>                   | <b>1158.1(19)</b>                               | <b>1161.6(21)</b>                 | <b>1.0018</b>                 | <b>1137.5</b> |
| 1041.2(7)                         | 930.2(6)                          | 1037.7(7)                                       | 1040.4(7)                         | 1.0008                        |               |
| 991.0(0)                          | 810.6(0)                          | 991.0(0)                                        | 991.0(0)                          | 1.0000                        |               |
| 975.9(0)                          | 800.4(0)                          | 975.8(0)                                        | 975.9(0)                          | 1.0000                        |               |
| 919.4(7)                          | 808.8(2)                          | 918.0(5)                                        | 919.3(6)                          | 1.0002                        |               |
| 885.3(5)                          | 743.1(14)                         | 884.5(4)                                        | 884.8(5)                          | 1.0006                        |               |
| 860.5(2)                          | 688.1(1)                          | 860.3(2)                                        | 860.5(2)                          | 1.0000                        |               |
| 852.5(8)                          | 826.6(3)                          | 846.2(8)                                        | 849.1(10)                         | 1.0040                        |               |
| <b>738.1(22)</b>                  | <b>573.3(3)</b>                   | <b>737.9(22)</b>                                | <b>738.0(22)</b>                  | <b>1.0000</b>                 | <b>719.5</b>  |
| <b>670.3(30)</b>                  | <b>653.2(28)</b>                  | <b>668.0(30)</b>                                | <b>660.5(27)</b>                  | <b>1.0148</b>                 | <b>638.5</b>  |
| <b>616.0(71)</b>                  | <b>457.9(2)</b>                   | <b>615.8(72)</b>                                | <b>615.8(70)</b>                  | <b>1.0002</b>                 | <b>609.2</b>  |
| 579.2(1)                          | 516.2(31)                         | 579.2(1)                                        | 578.3(0)                          | 1.0016                        |               |
| 498.5(28)                         | 471.8(39)                         | 495.4(27)                                       | 487.5(29)                         | 1.0226                        |               |
| 479.7(5)                          | 468.4(4)                          | 479.2(5)                                        | 469.7(5)                          | 1.0212                        |               |
| 316.6(1)                          | 278.1(2)                          | 316.6(1)                                        | 314.5(10)                         | 1.0070                        |               |
| 315.3(10)                         | 309.2(9)                          | 310.8(10)                                       | 313.8(1)                          | 1.0049                        |               |
| 110.4(4)                          | 100.0(4)                          | 109.2(4)                                        | 110.4(4)                          | 1.0000                        |               |

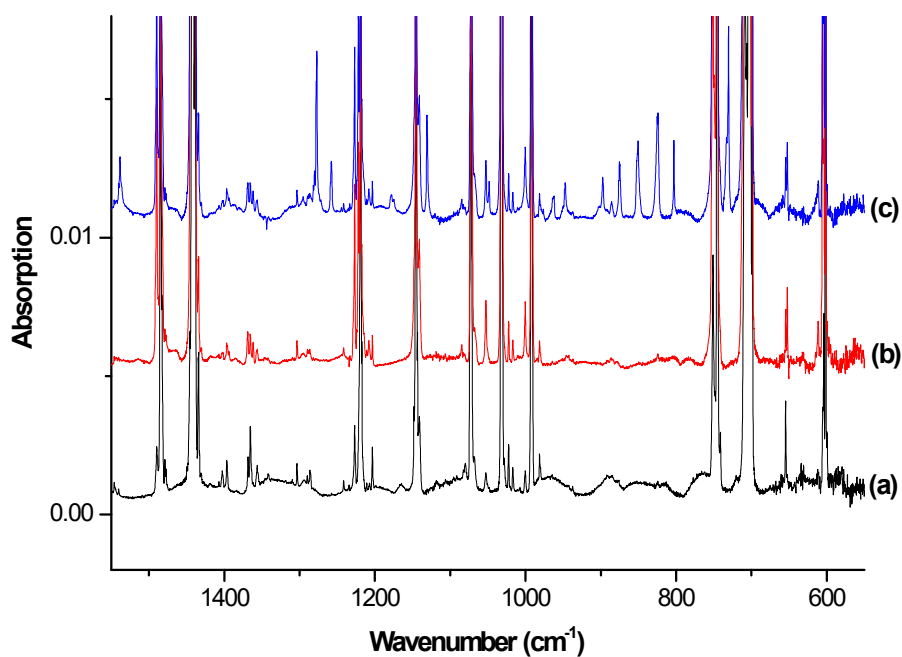

**Figure S1.** Infrared spectra in the  $1550\text{-}550\text{ cm}^{-1}$  region from the deposition of 0.05% net pyridine in neon. (a) after 10 min of gas deposition at 4 K, (b) after annealing to 12 K, (c) after 15 min of  $280\text{ nm} > \lambda > 250\text{ nm}$  UV light irradiation at 4 K.

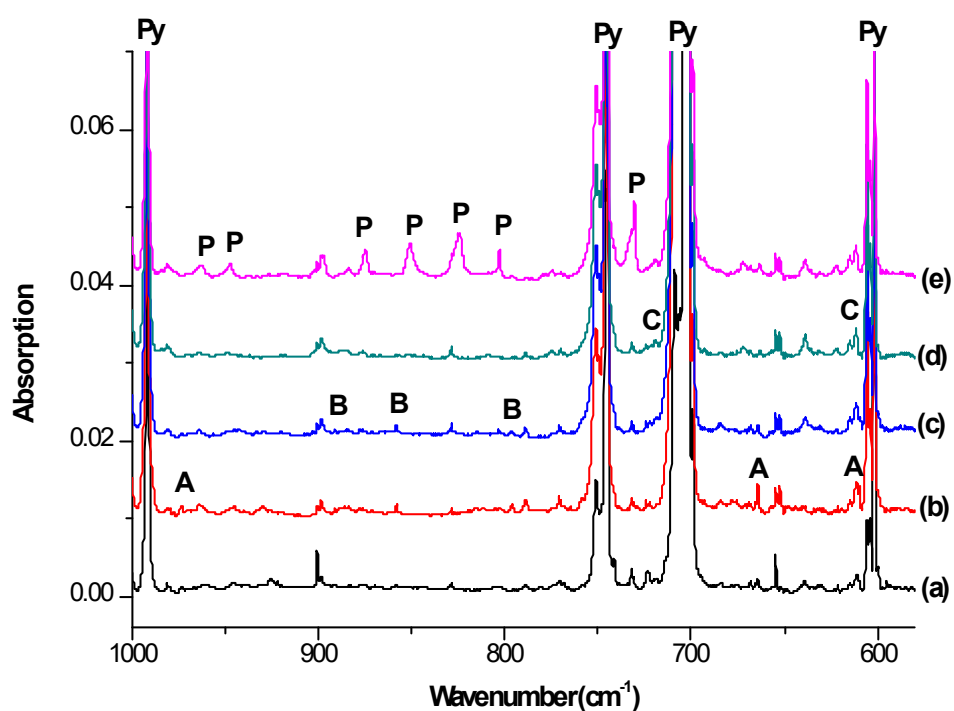

**Figure S2.** Infrared spectra in the  $1000\text{-}580\text{ cm}^{-1}$  region from the co-deposition of  $^{10}\text{B}$  atoms with 0.05% pyridine in neon. (a) after 30 min of sample deposition at 4 K, (b) after annealing to 12 K, (c) after 15 min of visible light ( $495 < \lambda < 580\text{ nm}$ ) irradiation at 4 K, (d) after 15 min of UV-visible light ( $280 < \lambda < 580\text{ nm}$ ) irradiation at 4 K. (e) after 15 min of UV-visible light ( $250 < \lambda < 580\text{ nm}$ ) irradiation at 4 K. **P** represents the photoisomerization product of pyridine. **Py**= pyridine.

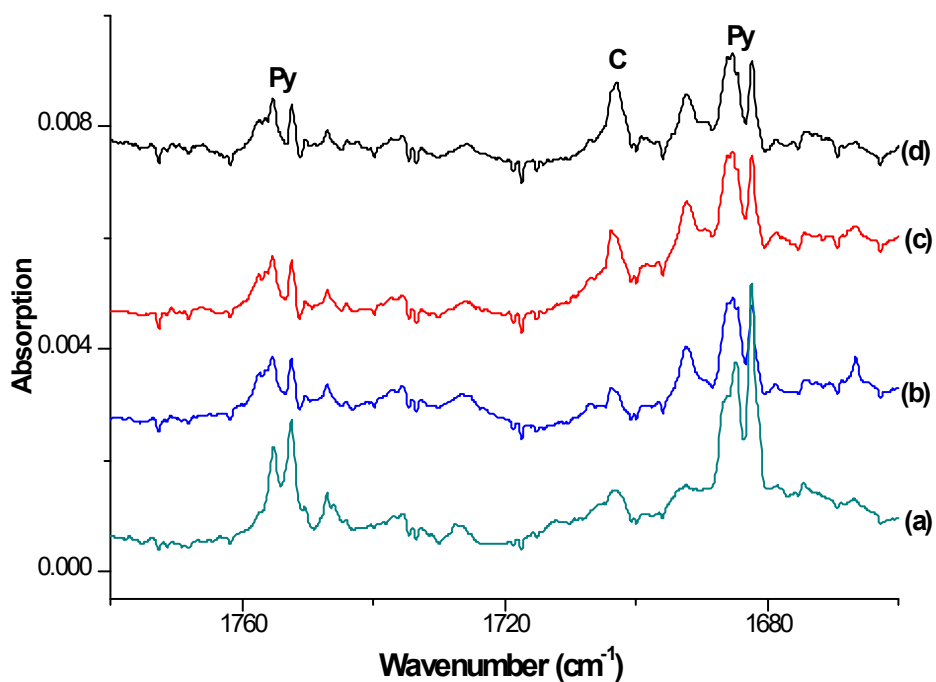

**Figure S3.** Infrared spectra in the 1780-1660  $\text{cm}^{-1}$  region from the co-deposition of  $^{11}\text{B}$  atoms with 0.05% pyridine in neon. (a) after 30 min of sample deposition at 4 K, (b) after annealing to 12 K, (c) after 15 min of visible light ( $495 < \lambda < 580 \text{ nm}$ ) irradiation at 4 K, (d) after 15 min of UV-visible light ( $280 < \lambda < 580 \text{ nm}$ ) irradiation at 4 K.

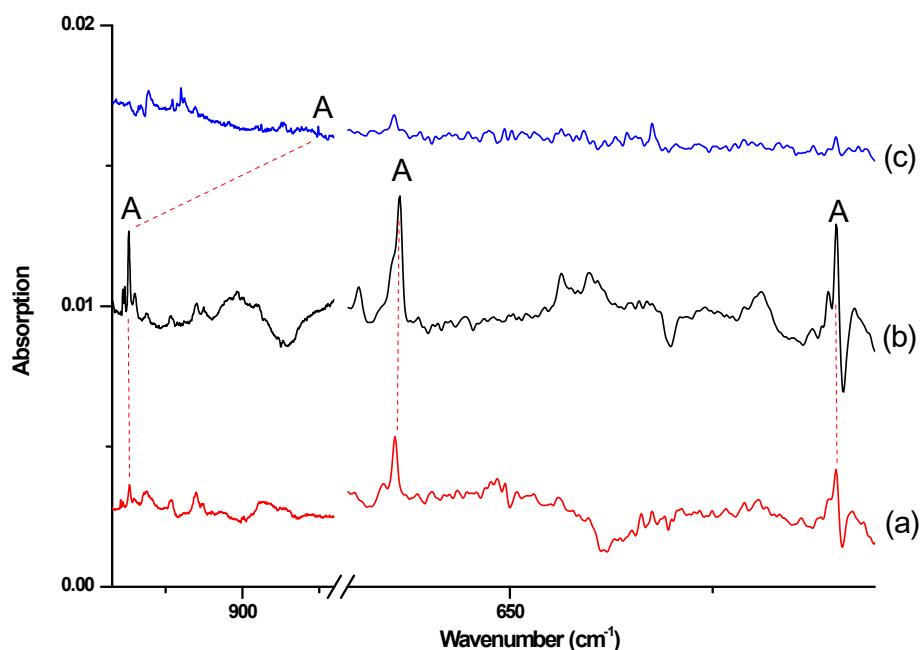

**Figure S4.** Difference spectra in the 1000-600  $\text{cm}^{-1}$  region from co-deposition of boron atoms with isotopic labeled pyridine in solid neon (spectra taken after 12 K annealing minus spectrum after 15 min of  $\lambda > 495 \text{ nm}$  UV light irradiation). (a)  $^{10}\text{B} + 0.05\% \text{ C}_5\text{H}_5\text{N}$ , (b)  $^{11}\text{B} + 0.05\% \text{ C}_5\text{H}_5\text{N}$ , (c)  $^{10}\text{B} + 0.05\% \text{ C}_5\text{D}_5\text{N}$ . The spectra show the variations in the infrared absorption peaks of species A transitioning to C under different isotopic conditions.



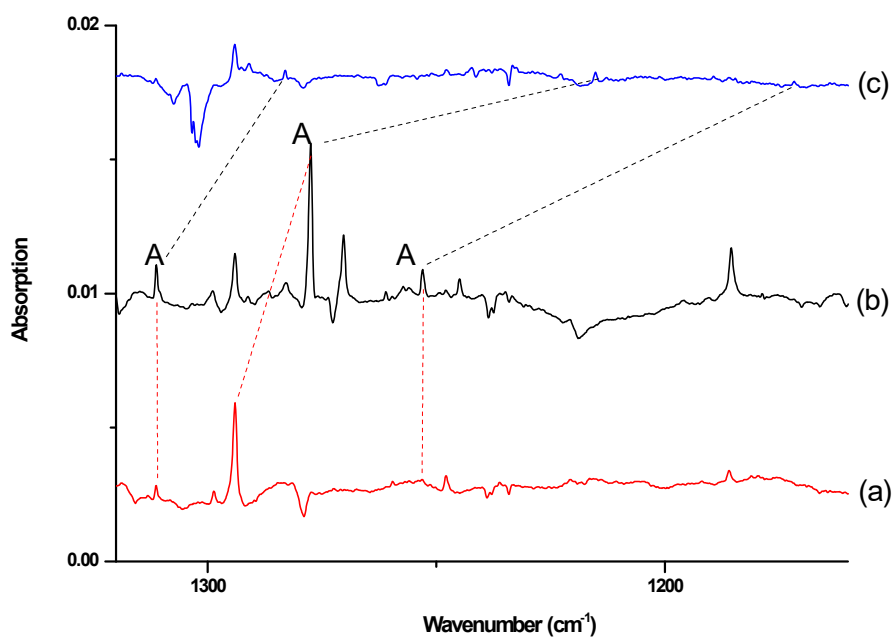

**Figure S5.** Difference spectra in the 1350-1150  $\text{cm}^{-1}$  region from co-deposition of boron atoms with isotopic labeled pyridine in solid neon (spectrum taken after 12 K annealing minus spectrum after 15 min of  $\lambda > 495$  nm UV light irradiation). (a)  $^{10}\text{B} + 0.05\% \text{C}_5\text{H}_5\text{N}$ , (b)  $^{11}\text{B} + 0.05\% \text{C}_5\text{H}_5\text{N}$ , (c)  $^{10}\text{B} + 0.05\% \text{C}_5\text{D}_5\text{N}$ . The spectra show the variations in the infrared absorption peaks of species A transitioning to C under different isotopic conditions.

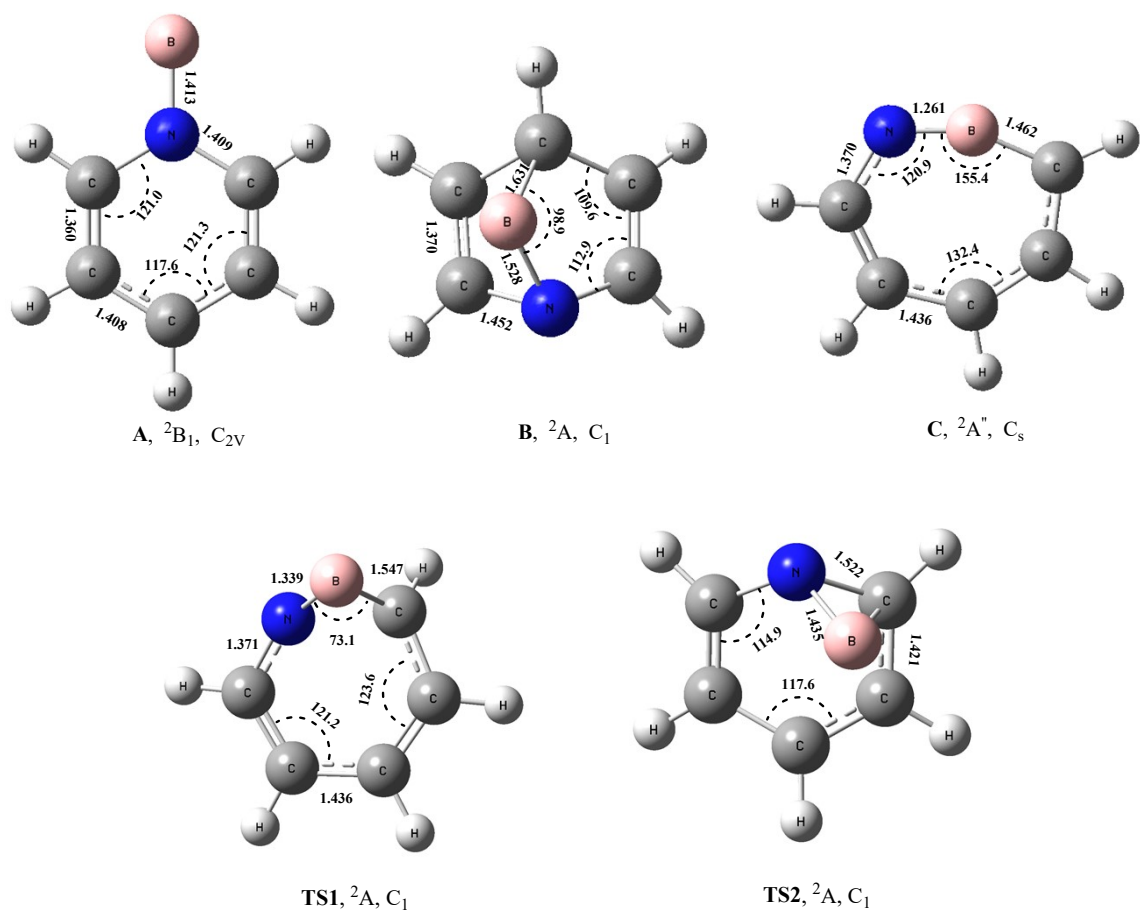

**Figure S6.** Optimized structures of the intermediates and transition states involved in the reaction pathways as shown in figure 6 at the B3LYP/aug-ccpVTZ level. Bond lengths in angstroms and bond angles in degrees.

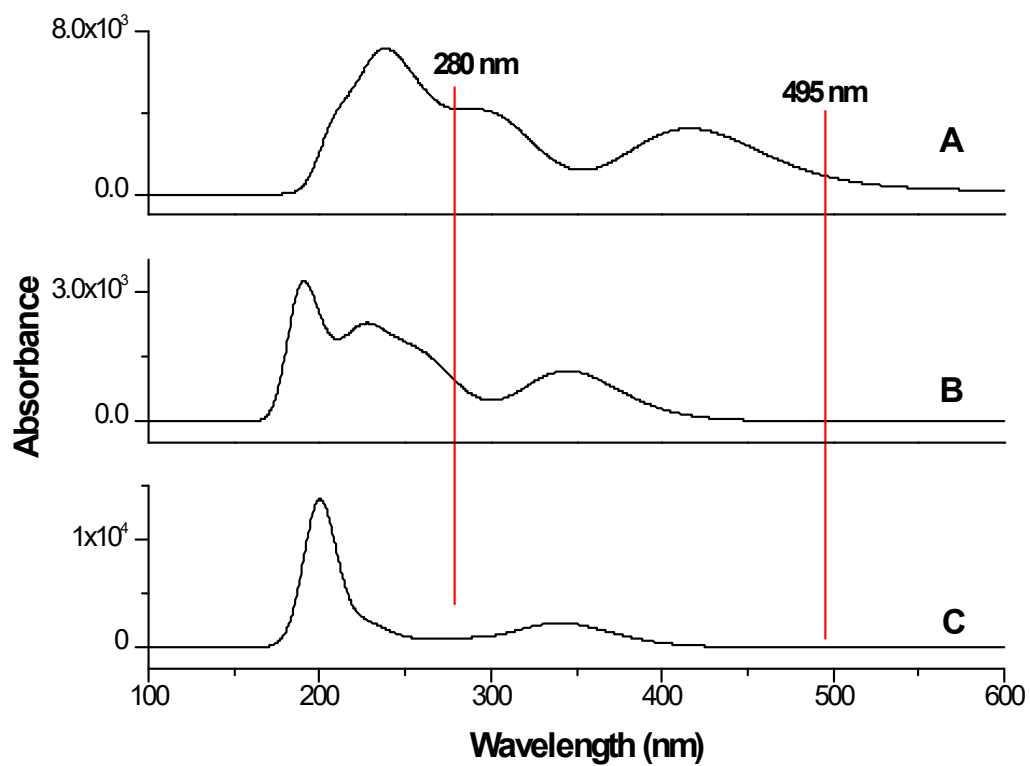

**Figure S7.** The calculated electronic absorptions spectrum of species **A**, **B** and **C** at the B3LYP-TD/aug-cc-pVTZ level of theory.

**Table S6.** Calculated atomic coordinates (in Angstroms) of species **A–C** at the B3LYP/aug-cc-pVTZ level.

(a) **A**, ( $C_{2v}$ ,  ${}^2B_1$ )

|   |             |             |             |
|---|-------------|-------------|-------------|
| C | 0.39981800  | 1.20656600  | 0.00000100  |
| C | -0.96014600 | 1.20474800  | 0.00000000  |
| C | -1.68957900 | 0.00000000  | -0.00000100 |
| C | -0.96014600 | -1.20474800 | 0.00000000  |
| C | 0.39981800  | -1.20656600 | 0.00000100  |
| H | 0.99369000  | 2.10676200  | 0.00000100  |
| H | -1.47092900 | 2.15744400  | -0.00000100 |
| H | -2.76791700 | 0.00000000  | 0.00000000  |
| H | -1.47092900 | -2.15744400 | -0.00000100 |
| H | 0.99369000  | -2.10676200 | 0.00000200  |
| B | 2.53956800  | 0.00000000  | -0.00000200 |
| N | 1.12656600  | 0.00000000  | 0.00000100  |

(b) **B**, ( $C_1$ ,  ${}^2A$ )

|   |             |             |             |
|---|-------------|-------------|-------------|
| C | 1.25430200  | -0.72972600 | -0.19405700 |
| C | 1.35758400  | 0.59575800  | -0.21715300 |
| C | 0.08069600  | 1.20929400  | 0.27187800  |
| C | -1.11237000 | 0.68369900  | -0.47216100 |
| C | -1.13352100 | -0.68504700 | -0.40824500 |
| H | 1.95633100  | -1.46950800 | -0.54670400 |
| H | 2.19472200  | 1.16911300  | -0.58685600 |
| H | 0.04754000  | 2.25799800  | 0.52669100  |
| H | -1.95847500 | 1.28920900  | -0.76567000 |
| H | -1.95541500 | -1.33200400 | -0.67736900 |
| N | -0.00732500 | -1.18956500 | 0.35702800  |
| B | -0.58271600 | -0.00634300 | 1.13383000  |

(c) C, (C<sub>s</sub>, <sup>2</sup>A'')

---

|   |             |             |            |
|---|-------------|-------------|------------|
| C | 0.62010800  | -1.28599600 | 0.00000000 |
| C | -0.81597400 | -1.25788400 | 0.00000000 |
| C | -1.66892900 | -0.18490300 | 0.00000000 |
| C | 1.58194000  | -0.27054100 | 0.00000000 |
| C | 1.43296200  | 1.13149600  | 0.00000000 |
| H | 1.03496700  | -2.28545200 | 0.00000000 |
| H | -1.29100900 | -2.23135700 | 0.00000000 |
| H | -2.73803000 | -0.36574700 | 0.00000000 |
| H | 2.60591600  | -0.63328700 | 0.00000000 |
| H | 2.29142800  | 1.78018400  | 0.00000000 |
| B | 0.00000000  | 1.41725200  | 0.00000000 |
| N | -1.25770200 | 1.12233900  | 0.00000000 |

---
